1 **Combined use of procalcitonin and C-reactive protein levels can help clinically diagnose bacterial**  
2 **co-infections in children infected with H1N1 influenza**

3

4 Zhihao Li<sup>1 #</sup>, Liya He<sup>2 #</sup>, Shuhua Li<sup>2</sup>, Waner He<sup>2</sup>, Caihui Zha<sup>2</sup>, Qiaozhen Hou<sup>2</sup>, Weiyang Wang<sup>2</sup>, Xin Sun<sup>3 \*</sup>,  
5 Huiying Liang<sup>1 \*</sup>, Wanxing Ou<sup>2</sup>

6

7 <sup>1</sup>Institute of Pediatrics, Guangzhou Women and Children's Medical Center, Guangzhou Medical University,  
8 Guangzhou, China.

9 <sup>2</sup> Department of Pediatrics, Guangzhou Women and Children's Medical Center, Guangzhou Medical University,  
10 Guangzhou, China.

11 <sup>3</sup>Department of Medical Administration, Guangzhou Women and Children's Medical Center, Guangzhou Medical  
12 University, Guangzhou, China.

13 # These authors contributed equally to this work

14 \* Corresponding authors: X.S. (email: doctorsunxin@hotmail.com) or H.L. (email: lianghuiying@hotmail.com)

15

16 **Abstract**

17 **Objective**

18 This study evaluated the diagnostic value of measuring the levels of procalcitonin (PCT) and C-reactive protein  
19 (CRP) to differentiate children co-infected with H1N1 influenza and bacteria from children infected with H1N1  
20 influenza alone and to provide a reliable clinical diagnostic support system with improved accuracy and precision  
21 control.

22 **Methods**

23 Consecutive patients (children aged <5 years) with laboratory-confirmed H1N1 influenza who were hospitalized or  
24 received outpatient care from a tertiary-care hospital in Canton, China between 1 January 2012 and 1 September  
25 2017 were included in the present study. Laboratory results, including serum PCT and CRP levels, white blood cell  
26 (WBC) counts, and blood and sputum cultures, were analyzed. The predictive value of the combination of  
27 biomarkers versus either biomarker alone for diagnosing bacterial co-infections was evaluated using logistic  
28 regression analyses.

29 **Results**

30 Of 3180 children infected with H1N1 influenza, 226 (7.1%) met the bacterial co-infection criteria, with  
31 *Staphylococcus pneumoniae* being the most commonly identified bacteria (36.28%). Significantly higher PCT  
32 (1.46 vs 0.21 ng/ml,  $p<0.001$ ) and CRP (19.20 vs 5.10 mg/dl,  $p<0.001$ ) levels were detected in the bacterial  
33 co-infection group than in the H1N1 infection only group. Multivariate logistic regression analysis showed

34 independent associations between PCT (odds ratio [OR]: 1.73, 95% confidence interval [CI], 1.34-2.42,  $p < 0.001$ )  
35 and CRP levels (OR: 1.09, 95% CI, 1.06-1.13,  $p < 0.001$ ) with bacterial co-infections. Using PCT or CRP levels  
36 alone, the areas under the curves (AUCs) for predicting bacterial co-infections were 0.801 (95% CI, 0.772-0.855)  
37 and 0.762 (95% CI, 0.722-0.803), respectively. Using a combination of PCT and CRP, the logistic regression-based  
38 model,  $\text{Logit}(P) = -1.912 + 0.546 \text{ PCT} + 0.087 \text{ CRP}$ , showed significantly greater accuracy (AUC: 0.893, 95% CI:  
39 0.842-0.934) than did the other three biomarkers.

#### 40 **Conclusions**

41 The combination of PCT and CRP levels could provide a useful method of distinguishing bacterial co-infections  
42 from an H1N1 influenza infection alone in children during the early disease phase. After further validation, the  
43 flexible model derived here could assist clinicians in decision-making processes.

#### 44 **Keywords**

45 H1N1 influenza; Bacterial co-infection; Procalcitonin; C-reactive protein

46

#### 47 **Introduction**

48 Co-infections with bacterial pathogens are a major cause of morbidity and mortality in children with H1N1  
49 influenza infections worldwide [1]. Most deaths that occurred during several H1N1 influenza pandemics in  
50 1918-1919 were due to bacterial co-infections rather than direct effects of the virus [2]. A recently study estimated  
51 that bacterial co-infection was approximately 33% in patients hospitalized with H1N1 infection [3], resulting in  
52 more than 74% of patients receive antibiotic therapy after admission for initial H1N1 influenza infection [4],  
53 despite adverse effects, the costs and increasing antibiotic resistance. Therefore, an early and rapid diagnosis was  
54 recognized as a priority in managing bacterial co-infections, which may assist clinicians in initiating appropriate  
55 antibiotic treatments to improve patient outcomes [5].

56 However, an early diagnosis of bacterial co-infections among patients with H1N1 influenza is challenging,  
57 because of the many overlapping symptoms and the lack of specific clinical manifestations of bacterial  
58 co-infections compared with H1N1 infection alone [6]; furthermore, young children cannot accurately describe  
59 their own disease symptoms, making the diagnosis even more difficult. Microbiological culture is the gold  
60 standard for diagnosing bacterial co-infections; however, current microbiological culture was time-consuming  
61 cultivation of bacteria before identification via colony and biochemical profiling, and the routine testing procedure  
62 may take several days and can also result in false-negative results.

63 Consequently, the availability of an efficient biomarkers system would be crucial in helping to quickly

64 differentiate bacterial co-infections from H1N1 infections alone. Recently, several inflammatory biomarkers have  
65 been evaluated for their abilities to distinguish co-infections with H1N1 and bacteria from H1N1 infections alone.  
66 Among these biomarkers, traditional biomarkers such as a white blood cell (WBC) count [7] and C-reactive  
67 protein (CRP) levels[8] are commonly used to differentiate between bacterial and viral etiologies. Although  
68 previous studies have focused on using CRP levels to detect bacterial co-infections in patients with H1N1  
69 infections, the evidence from these studies is inconsistent. Studies suggested serum CRP as a potential diagnostic  
70 biomarker [9-11], whereas Piacentini et al.[12] found that CRP levels were unable to distinguish bacterial  
71 co-infections from H1N1 infections. Another interesting biomarker is procalcitonin (PCT), the prohormone of  
72 calcitonin produced by C cells in the thyroid. Plasma PCT concentrations are low in healthy individuals and  
73 increase during bacterial, parasitic, or fungal infections, whereas they remain at normal levels during viral  
74 infections or noninfectious inflammatory reactions[13]. Studies have attempted to assess PCT levels in patients  
75 with H1N1 infection and found that PCT helped to distinguish bacterial co-infections from H1N1 infections[14,  
76 15]. Nevertheless, to the best of our knowledge, previous studies published to date have focused on adults[14, 15]  
77 and patients with severe disease[16], but have included few patients with H1N1 infections.  
78 Thus, in the present study, we conducted a retrospective analysis of 3180 children with H1N1 infection, to  
79 evaluate the diagnostic levels of serum PCT, CRP and WBC alone and in combination in differentiating bacterial  
80 co-infections from H1N1 influenza infections alone in children, to provide a reliable clinical diagnostic support  
81 system for improving diagnostic accuracy and for enabling early treatment of bacterial co-infections during H1N1  
82 influenza infections.

83

84

## 85 **Methods**

### 86 **Settings and participants**

87 We performed a retrospective cohort study of consecutive patients with laboratory-confirmed H1N1 influenza  
88 infections, all of whom were children <5 years old who were hospitalized or received outpatient care from a  
89 tertiary-care hospital in Canton, China between 1 January 2012 and 1 September 2017. Demographic and clinical  
90 characteristics, including age, gender, weight, diagnoses, total length of hospital stay, intensive care unit (ICU)  
91 admission, total length of ICU stay, total cost and in-hospital mortality were recorded. Data from initial laboratory  
92 exams, including serum PCT and CRP levels, WBC counts, and blood and sputum cultures were collected. The

93 ethics committee of Guangzhou Woman and Children's Medical Center approved our study, and written informed  
94 consent was obtained from all the participants' parents or designated guardians.

95

#### 96 **Definitions**

97 Patients diagnosed with H1N1 influenza infection confirmed by real-time reverse transcriptase polymerase chain  
98 reaction (RT-PCR) [17] of nasopharyngeal secretions or bronchoalveolar lavage fluid samples within the first 48  
99 hours hospitalization were included in the study. Bacterial co-infection was defined as a positive H1N1 influenza  
100 viral PCR result with one or more bacterial pathogens detected. Bacterial cultures were obtained from blood, valid  
101 sputum, lower respiratory tract samples or samples of other normally sterile fluids within the first 48 hours  
102 hospitalization. We selected patients for this study who did not receive antibiotics prior to hospitalization to better  
103 differentiate patients co-infected with H1N1 and bacteria from patients infected with H1N1 alone.

104

#### 105 **Inflammatory biomarkers (PCT, CRP and WBC) measurements**

106 Venous blood samples were collected from the patients infected with H1N1 upon admission. Serum PCT levels  
107 were determined using an enzyme-linked fluorescence analysis (ELFA, VIDAS BRAHMS PCT kit, bioMerieux  
108 SA, France). Serum CRP levels were determined using BNProSpec automatic protein analyzer (Dade Behring  
109 BN Prospec, USA)[18], and WBC counts were analyzed by using an Sysmex XE-2100 haematology analyser  
110 (Sysmex, Kobe, Japan).

111

112

#### 113 **Statistical analysis**

114 Categorical variables are summarized using absolute values and percentages, and continuous variables are  
115 presented as medians and interquartile ranges (IQR). The Chi-square tests (for nominal variables) or the Wilcoxon  
116 rank sum test (for continuous variables) was employed for between-group comparisons. Univariate logistic  
117 regression analysis was used to assess the ability of each biomarker (PCT, CRP and WBC) to diagnose bacterial  
118 co-infections. Furthermore, iterative biomarker(s) were selected (including biomarker with  $p < 0.10$ ) using  
119 automatic forwards stepwise regression, and the multivariate logistic regression model was built. The performance  
120 of the models was then assessed by calculating the area under the receiver-operating characteristic (ROC)  
121 curve(AUC). The AUC values were compared for each biomarkers individually and in conjunction with  
122 biomarkers model by Hanley and McNeil method[19]. The sensitivity, specificity, positive predictive value (PPV)

123 and negative predictive value (NPV) were also reported. The Youden index (sensitivity + specificity-1) was used to  
124 determine the optimal ROC cutoff value. Moreover, 10-fold cross-validation to evaluate the robustness of the  
125 estimates obtained from the constructed model, as previously described [20], was performed. Then, we averaged  
126 the AUC, sensitivity and specificity values obtained from the 10-fold cross-validations to generate summary  
127 performance estimates.

128 All statistical analyses were performed using R Software, version 3.4.2 ([www.r-project.org](http://www.r-project.org)). A two-tailed  $p$  value  
129  $<0.05$  was considered significant.

130

## 131 **Results**

### 132 **Study population and bacterial pathogen characteristics**

133 During the study period, 3180 children with laboratory-confirmed H1N1 influenza infection were included, with a  
134 median age of 3.6 years (IQR, 1.8-7.5 years); 1784 (52.3%) were males. Among these patients, 226 (7.1%) had a  
135 proven bacterial co-infection. *Streptococcus pneumoniae* was the most frequent pathogens causing the bacterial  
136 co-infection in 82(36.2%) cases, followed by *Staphylococcus aureus* in 55 (24.3%) cases and *Pseudomonas*  
137 *aeruginosa* in 34 (15.0%) cases (Table S1). Eight children (3.5%) displayed two positive respiratory tract bacterial  
138 cultures.

139

140 When the baseline characteristics and clinical outcomes of the H1N1 plus bacterial co-infection group were  
141 compared, children in the H1N1-alone group were older, but this result was not significant (median age, 2.5 vs 2.4  
142 years,  $p=0.197$ ). Differences in gender or weight were not observed between the two groups; however, the  
143 bacterial co-infection group showed significantly higher inpatient admission (14.3% vs 50.4%,  $p<0.001$ ) and ICU  
144 admission rates (2.6% vs 36.3%,  $p<0.001$ ) than patients in the H1N1-alone group. The bacterial co-infection group  
145 also required longer hospital stays (5 vs 10 days,  $p=0.003$ ) than H1N1-alone group and thus had much higher  
146 hospital costs (median hospital cost, 1213.2 vs 3467.3 RMB,  $p<0.001$ ). Moreover, a higher in-hospital mortality  
147 rate was noted for the bacterial co-infection group than the H1N1 alone group (0.1% vs 4.8%,  $p<0.001$ ) (Table 1).

148

### 149 **Comparison of serum PCT, CRP and WBC levels between H1N1-alone and H1N1 with bacterial** 150 **co-infection groups**

151 Serum PCT, CRP and WBC levels were analyzed to identify potential biomarkers that distinguished between  
152 H1N1 infections and H1N1 and bacterial co-infections. The median serum PCT, CRP and WBC levels were all

153 significantly higher in the H1N1 with bacterial co-infection group than in the H1N1-alone group (median PCT  
154 level, 1.46 vs 0.21 ng/ml,  $p < 0.001$ ; median CRP level, 19.20 vs 5.10 mg/dl,  $p < 0.001$ , median WBC count, 8.50 vs  
155  $6.90 \times 10^9$  cells/l,  $p = 0.019$ ) (Figure 1).

156

#### 157 **Univariate and multivariate logistic regression analyses**

158 Univariate analysis revealed significant associations of serum PCT, CRP and WBC levels with co-infections with  
159 H1N1 and bacteria (odds ratio [OR]:1.65, 95 % confidence interval [CI] 1.34-2.06,  $p < 0.001$ ; OR: 1.08, 95 % CI  
160 1.06-1.09,  $p < 0.001$ ; OR:1.06, 95% CI 1.04-1.09,  $p = 0.02$ , respectively). The associations with PCT and CRP  
161 levels remained statistically significant ( $p < 0.05$ ) after the application of the forwards regression model, whereas  
162 WBC counts were excluded from the model ( $p < 0.05$ ). Then, multivariate logistic regression analysis showed that  
163 CRP (OR:1.09, 95% CI 1.06-1.13,  $p < 0.001$ ) and PCT levels (OR:1.73, 95%CI 1.34-2.42,  $p < 0.001$ ) were  
164 significant independent diagnostic biomarkers. (Table 2).

165

#### 166 **Comparison and validation of the model's diagnostic ability**

167 Because the serum PCT and CRP levels were independent predictors that differentiated patients with bacterial  
168 co-infections from patients infected with H1N1 alone, we constructed a new model, PCT&CRP [Logit (P) = -1.912  
169 + 0.546 PCT+ 0.087 CRP], that combined the PCT and CRP levels. The performance of the ROC curves of the  
170 constructed model, PCT, CRP, and WBC levels for differentiating children with H1N1 and bacterial co-infections  
171 from children infected with H1N1 alone were compared. The AUC, sensitivity, specificity, PPV, and NPV are  
172 shown in Table 3. The constructed model exhibited the largest AUC (0.893, 95%CI 0.852-0.934). The  $p$  values of  
173 the ROC curve comparison between the constructed model and CRP and PCT levels were all less than 0.01. The  
174 AUCs for PCT, CRP, and WBC levels were 0.801(95%CI, 0.772-0.855), 0.762(95%CI, 0.722-0.803), and  
175 0.551(95%CI, 0.502-0.592), respectively. The optimum cutoff values for PCT, CRP, and WBC were 0.52 ng/ml,  
176 13.55 mg/l and  $11.56 \times 10^9$  cells/l, respectively. Significant differences were observed among the ROC curves of  
177 the PCT, CRP, and WBC ( $p < 0.05$ ). The diagnostic ability of each model followed the order of PCT&CRP > PCT >  
178 CRP > WBC (Figure 2). The PCT&CRP was superior to use of the PCT, CRP and WBC alone in differentiating  
179 patients with bacterial co-infections from those infected with H1N1 alone. The robustness of PCT&CRP was  
180 internally evaluated through 10-fold cross-validation. On average, the constructed model presented an AUC of  
181 0.872, a sensitivity of 0.754 and a specificity of 0.896.

182

183

184 **Discussion**

185 Bacterial co-infection is especially known to excess the mortality and morbidity of H1N1 influenza.

186 Unfortunately, it is difficult to correctly diagnose bacterial coinfection based only on clinical criteria, as well as  
187 bacterial culturing is time-consuming. There is a crucial need to differentiate H1N1 patients with bacterial  
188 co-infection from H1N1 infection alone. The diagnostic and predictive value of serum PCT and CRP levels as  
189 biomarkers has been discussed in several studies[10, 14, 15, 21]. Shin et al. [10]found that serum PCT was a good  
190 indicator of in discriminating bacterial co-infections infection from H1N1 infections alone in 60 adult patients in  
191 ICU. Guervilly et al. [21] report that PCT values were statistically higher in patients with bacterial co-infections. In  
192 addition, PCT has been suggested to exclude bacterial co-infections in patients with an H1N1 infection and to  
193 reliably and accurately reduce inappropriate antibiotic exposure [14]. Our results showed that serum PCT levels  
194 was significantly higher in patients with bacterial co-infection compared to those infected H1N1 infection alone,  
195 reminding us that PCT was association with bacterial co-infection. Furthermore, the results of ROC curve analysis  
196 indicated that an AUC value of 0.801 (95% CI, 0.772-0.855), with cutoff value was 0.52ng/ml, supported the  
197 prognostic value of PCT in children with or with bacterial co-infection.

198 The diagnostic utility of CRP to differentiate bacterial co-infection from H1N1 infection is disputed [9-11, 15].  
199 Haran et al. [11]found that CRP as predictor of bacterial infection among patients with an H1N1 infection.  
200 Similarly, Shin et al. [10] reported that serum CRP levels was significantly higher in patients with bacterial  
201 co-infection compared to those infected with H1N1 alone. But other study suggested that CRP levels were unable  
202 to distinguish bacterial co-infections from H1N1 infections [9]. Our study showed that serum CRP levels was  
203 significantly higher in patients with bacterial co-infection compared to those infected H1N1 infection alone, it  
204 indicating that those biomarkers could be aid in discriminating between these conditions. Furthermore, our study  
205 showed that the diagnostic efficacy of PCT for bacterial co-infection in H1N1 infection was better than that of  
206 CRP (AUC 0.801 and 0.783, respectively;  $p<0.05$ ), consistent with the results of a previous study[11]. However,  
207 the AUC of WBC counts in diagnosing bacterial co-infections was 0.551 (95%CI, 0.502-0.592), indicating that  
208 WBC may not be a valuable biomarker for our cohort of children.

209 Previous study use of a combination of CRP and PCT levels for evaluating for bacterial co-infections increased the  
210 accuracy of differentiating children with bacterial co-infections from those infected with H1N1 alone[10] . Similar  
211 observations were reported in the present study, we used a multivariate logistic regression analysis to construct a  
212 new model using the PCT and CRP levels:  $[\text{Logit}(P)=-1.912+0.546 \text{ PCT}+0.087 \text{ CRP}]$ . The ROC curve analysis

213 yielded an AUC value for the model of up to 0.893, which was clearly superior to PCT or CRP levels alone  
214 ( $p < 0.05$ ). Furthermore, the constructed model [ $\text{Logit}(P) = -1.912 + 0.546\text{PCT} + 0.087\text{CRP}$ ] was internally validated  
215 through 10-fold cross-validation, resulting in high diagnostic accuracy. Therefore, the joint detection of PCT and  
216 CRP levels clearly improves the prognosis of children with H1N1 bacterial co-infection. Based on the results from  
217 our study, the combination of serum PCT and CRP levels will help clinicians determine the appropriate antibiotic  
218 therapy[22], thus potentially improving patient outcomes and reducing antibiotic overuse [5].

219 This study involved 3180 children with H1N1, 7.11% of whom presented a confirmed bacterial co-infection, after  
220 including both outpatients and inpatients. The proportion of bacterial co-infection while similar to that previously  
221 reported for H1N1. Nevertheless, previous studies of children with H1N1 influenza infection reported a bacterial  
222 co-infection rate ranging from 18% to 60%[23, 24]. These rates may be overestimated because the previous studies  
223 were limited to pediatric patients in the ICU, which represent a population with moderate to severe H1N1  
224 influenza infection. Moreover, children with bacterial co-infections exhibited a higher percentage of ICU  
225 admission rates in the current study.

226 Our study shows that *Streptococcus pneumoniae* was the leading cause of bacterial co-infection with H1N1,  
227 followed by *Staphylococcus aureus* and *Streptococcus pyogenes*, consistent with the results from previous  
228 studies[25, 26]. Additionally, children with H1N1 influenza infection and bacterial co-infection have been reported  
229 to exhibit a higher risk of severe outcomes [26-28]. In our study, patients co-infected with bacteria and H1N1  
230 exhibited increased percentages of inpatient and ICU admissions, higher costs and longer hospital stays.  
231 Furthermore, a significantly higher hospital mortality rate was observed in children with H1N1 and bacterial  
232 co-infections because bacterial co-infections represent an important mortality risk factor, possibly suggesting early  
233 empiric antibiotics treatment in severe patients may improve outcomes.

234 The potential limitations of our study should be mentioned. First, the levels of selected biomarkers (PCT, CRP and  
235 WBC) were evaluated only once. Second, our diagnostic model was derived and validated at a single hospital  
236 center, and it should be validated in a multicenter trial center before its broad application. Finally, we also  
237 acknowledge that, we may have created a bias, due to bacterial organisms cannot be confirmed solely with blood,  
238 sputum, lower respiratory tract samples.

239

## 240 **Conclusion**

241 In conclusion, we detected serum PCT and CRP levels and revealed that they represent promising biomarkers and  
242 useful clinical tools for differentiating pediatric patients with bacterial co-infections from those infected with



243 H1N1 alone. Furthermore, the combination of PCT and CRP levels could represent a useful method for screening  
244 bacterial co-infections from H1N1 influenza infections alone in children during the early disease phase. After  
245 further validation, the flexible model reported here may assist clinicians with decision-making processes.

246

#### 247 **Acknowledge**

248 This research did not receive any specific grant from funding agencies in the public, commercial, or not-for-profit  
249 sectors.

250

#### 251 **Reference**

252 [1] H. Nair, W.A. Brooks, M. Katz, A. Roca, J.A. Berkley, S.A. Madhi, J.M. Simmerman, A. Gordon, M.  
253 Sato, S. Howie, Global burden of respiratory infections due to seasonal influenza in young children: a  
254 systematic review and meta-analysis, *The Lancet*, 378 (2011) 1917-1930.

255 [2] J.A. McCullers, The co-pathogenesis of influenza viruses with bacteria in the lung, *Nature Reviews*  
256 *Microbiology*, 12 (2014) nrmicro3231.

257 [3] C. Cillóniz, S. Ewig, R. Menéndez, M. Ferrer, E. Polverino, S. Reyes, A. Gabarrús, M.A. Marcos, J.  
258 Cordoba, J. Mensa, Bacterial co-infection with H1N1 infection in patients admitted with community  
259 acquired pneumonia, *Journal of Infection*, 65 (2012) 223-230.

260 [4] S. Jain, L. Kamimoto, A.M. Bramley, A.M. Schmitz, S.R. Benoit, J. Louie, D.E. Sugerman, J.K.  
261 Druckenmiller, K.A. Ritger, R. Chugh, Hospitalized patients with 2009 H1N1 influenza in the United  
262 States, April–June 2009, *New England journal of medicine*, 361 (2009) 1935-1944.

263 [5] D.S. Chertow, M.J. Memoli, Bacterial coinfection in influenza: a grand rounds review, *Jama*, 309  
264 (2013) 275-282.

265 [6] R. Libster, J. Bugna, S. Coviello, D.R. Hijano, M. Dunaiewsky, N. Reynoso, M.L. Cavalieri, M.C.  
266 Guglielmo, M.S. Areso, T. Gilligan, Pediatric hospitalizations associated with 2009 pandemic influenza  
267 A (H1N1) in Argentina, *New England Journal of Medicine*, 362 (2010) 45-55.

268 [7] S. Lindbäck, U. Hellgren, I. Julander, L. Hansson, The value of C-reactive protein as a marker of  
269 bacterial infection in patients with septicaemia/endocarditis and influenza, *Scand. J. Infect. Dis.*, 21  
270 (1989) 543-549.

271 [8] S. Sanders, A. Barnett, I. Correa-Velez, M. Coulthard, J. Doust, Systematic review of the diagnostic  
272 accuracy of C-reactive protein to detect bacterial infection in nonhospitalized infants and children with  
273 fever, *The Journal of pediatrics*, 153 (2008) 570-574. e573.

274 [9] P.R. Ingram, T. Inglis, D. Moxon, D. Speers, Procalcitonin and C-reactive protein in severe 2009  
275 H1N1 influenza infection, *Intensive care medicine*, 36 (2010) 528-532.

276 [10] S. Ahn, W.Y. Kim, S.H. Kim, S. Hong, C.M. Lim, Y. Koh, K.S. Lim, W. Kim, Role of procalcitonin and  
277 C - reactive protein in differentiation of mixed bacterial infection from 2009 H1N1 viral pneumonia,  
278 *Influenza and other respiratory viruses*, 5 (2011) 398-403.

279 [11] J.P. Haran, F.L. Beaudoin, S. Suner, S. Lu, C-reactive protein as predictor of bacterial infection  
280 among patients with an influenza-like illness, *The American journal of emergency medicine*, 31 (2013)  
281 137-144.

- 282 [12] E. Piacentini, B. Sánchez, V. Arauzo, E. Calbo, E. Cuchi, J.M. Nava, Procalcitonin levels are lower in  
283 intensive care unit patients with H1N1 influenza A virus pneumonia than in those with  
284 community-acquired bacterial pneumonia. A pilot study, *Journal of critical care*, 26 (2011) 201-205.
- 285 [13] D. Gendrel, J. Raymond, M. Assicot, F. Moulin, J.-L. Iniguez, P. Lebon, C. Bohuon, Measurement of  
286 procalcitonin levels in children with bacterial or viral meningitis, *Clinical infectious diseases*, 24 (1997)  
287 1240-1242.
- 288 [14] A.H. Rodríguez, F.X. Avilés-Jurado, E. Díaz, P. Schuetz, S.I. Trefler, J. Solé-Violán, L. Cordero, L.  
289 Vidaur, Á. Estella, J.C.P. Laderas, Procalcitonin (PCT) levels for ruling-out bacterial coinfection in ICU  
290 patients with influenza: a CHAID decision-tree analysis, *Journal of infection*, 72 (2016) 143-151.
- 291 [15] E. Cuquemelle, F. Soulis, D. Villers, F. Roche-Campo, C.A. Somohano, M. Fartoukh, A. Kouatchet, B.  
292 Mourvillier, J. Dellamonica, W. Picard, Can procalcitonin help identify associated bacterial infection in  
293 patients with severe influenza pneumonia? A multicentre study, *Intensive care medicine*, 37 (2011)  
294 796-800.
- 295 [16] R. Pfister, M. Kochanek, T. Leygeber, C. Brun-Buisson, E. Cuquemelle, M.P. Machado, E. Piacentini,  
296 N.E. Hammond, P.R. Ingram, G. Michels, Procalcitonin for diagnosis of bacterial pneumonia in critically  
297 ill patients during 2009 H1N1 influenza pandemic: a prospective cohort study, systematic review and  
298 individual patient data meta-analysis, *Critical care*, 18 (2014) R44.
- 299 [17] C. Duncan, J.L. Guthrie, N. Tijet, N. Elngihy, C. Turenne, C. Seah, R. Lau, L. McTaggart, G. Mallo, S.  
300 Perusini, Analytical and clinical validation of novel real-time reverse transcriptase–polymerase chain  
301 reaction assays for the clinical detection of swine-origin H1N1 influenza viruses, *Diagnostic  
302 microbiology and infectious disease*, 69 (2011) 167-171.
- 303 [18] A. Esfahani, N. Makhdami, E. Faramarzi, M. Asghari Jafarabadi, A. Ostadrahimi, M. Ghayour  
304 Nahand, Z. Ghoreishi, Prealbumin/CRP based prognostic score, a new tool for predicting metastasis in  
305 patients with inoperable gastric cancer, *Gastroenterology research and practice*, 2016 (2016).
- 306 [19] B.J. McNeil, J.A. Hanley, Statistical approaches to the analysis of receiver operating characteristic  
307 (ROC) curves, *Medical decision making*, 4 (1984) 137-150.
- 308 [20] R. Tibshirani, T. Hastie, B. Narasimhan, G. Chu, Diagnosis of multiple cancer types by shrunken  
309 centroids of gene expression, *Proceedings of the National Academy of Sciences*, 99 (2002) 6567-6572.
- 310 [21] C. Guervilly, Y. Coisel, E. Botelho-Nevers, S. Dizier, M. Castanier, R. Lepaul-Ercole, O. Brissy, A. Roch,  
311 J.-M. Forel, L. Papazian, Significance of high levels of procalcitonin in patients with influenza A (H1N1)  
312 pneumonia, *Journal of Infection*, 61 (2010) 355-358.
- 313 [22] W.C. Albrich, S. Harbarth, Pros and cons of using biomarkers versus clinical decisions in start and  
314 stop decisions for antibiotics in the critical care setting, *Intensive care medicine*, 41 (2015) 1739-1751.
- 315 [23] S.B. Carr, E.E. Adderson, H. Hakim, X. Xiong, X. Yan, M. Caniza, Clinical and demographic  
316 characteristics of seasonal influenza in pediatric patients with cancer, *The Pediatric infectious disease  
317 journal*, 31 (2012) e202.
- 318 [24] E. Cordero, P. Pérez - Romero, A. Moreno, O. Len, M. Montejo, E. Vidal, P. Martín - Dávila, M.  
319 Fariñas, N. Fernández - Sabé, M. Giannella, Pandemic influenza A (H1N1) virus infection in solid organ  
320 transplant recipients: impact of viral and non - viral co - infection, *Clinical Microbiology and Infection*,  
321 18 (2012) 67-73.
- 322 [25] Q. Zhang, W. Ji, Z. Guo, Z. Bai, N.E. MacDonald, Risk factors and outcomes for pandemic H1N1  
323 influenza compared with seasonal influenza in hospitalized children in China, *Canadian Journal of  
324 Infectious Diseases and Medical Microbiology*, 23 (2012) 199-203.

325 [26] C. Reed, A.J. Kallen, M. Patton, K.E. Arnold, M.M. Farley, J. Hageman, L. Finelli, Infection with  
326 community-onset Staphylococcus aureus and influenza virus in hospitalized children, The Pediatric  
327 infectious disease journal, 28 (2009) 572-576.

328 [27] T. Nguyen, U.G. Kyle, N. Jaimon, M.H. Tchamatchi, J.A. Coss-Bu, F. Lam, J. Teruya, L. Loftis,  
329 Coinfection with Staphylococcus aureus increases risk of severe coagulopathy in critically ill children  
330 with influenza A (H1N1) virus infection, Critical care medicine, 40 (2012) 3246.

331 [28] N. Bhat, J.G. Wright, K.R. Broder, E.L. Murray, M.E. Greenberg, M.J. Glover, A.M. Likos, D.L. Posey,  
332 A. Klimov, S.E. Lindstrom, Influenza-associated deaths among children in the United States, 2003–2004,  
333 New England Journal of Medicine, 353 (2005) 2559-2567.

334

335

336

337

338

339

340

341

342

343

344

345

346

347

348

349

350

351

352

353

354 **Table**

355 **Table 1** Demographic and clinical characteristics of patients with H1N1 influenza who presented with and without  
356 bacterial co-infections.

357 Abbreviations: IQR: interquartile range; ICU: intensive care unit; \* The differences between the H1N1-alone

358 group and bacterial co-infection group were examined using the Wilcoxon rank sum test or Chi-square tests.

359

360 **Table 2** Univariate and multivariate logistic regression analyses of biomarkers for of bacterial co-infection in  
361 H1N1 patients infected with H1N1.

362 Abbreviations:  $\beta$ : regression coefficient; OR: odds ratio; CI: confidence interval; \* In the multivariate logistic  
363 regression analysis, WBC counts ( $p>0.05$ ) were excluded from the final model based on the results of the forward  
364 stepwise analysis.

365

366 **Table 3** Discriminatory performance of WBC, CRP, PCT and the constructed model for detecting patients with  
367 H1N1 influenza and a bacterial co-infection.

368 Abbreviations: AUC: area under the receiver-operating-characteristic curve; CI: confidence interval; PPV: positive  
369 predictive value; NPV: negative predictive value; PCT&CRP:  $\text{Logit}(P) = -1.912 + 0.546 \text{ PCT} + 0.087 \text{ CRP}$ .

370

371 **Figure**

372 **Figure 1** Serum PCT (A), CRP (B) and WBC (C) levels in patients with H1N1 influenza who presented with and  
373 without bacterial co-infections. The differences between the H1N1-alone group and bacterial co-infection group  
374 were examined using the Wilcoxon rank sum test.

375

376 **Figure 2** ROC curves of PCT, CRP, WBC and PCT&CRP ( $\text{Logit}(P) = -1.912 + 0.546 \text{ PCT} + 0.087 \text{ CRP}$ ) for  
377 differentiating patients with bacterial co-infections from those with infected H1N1 alone.

378

379 **Supplementary material**

380 **Table S1** Pathogens isolated in patients with H1N1 influenza and a bacterial co-infection

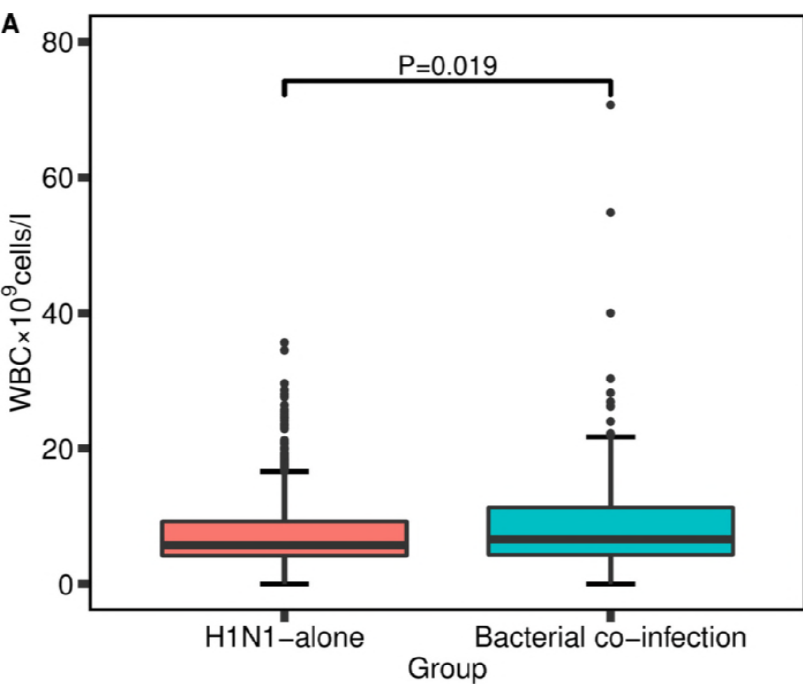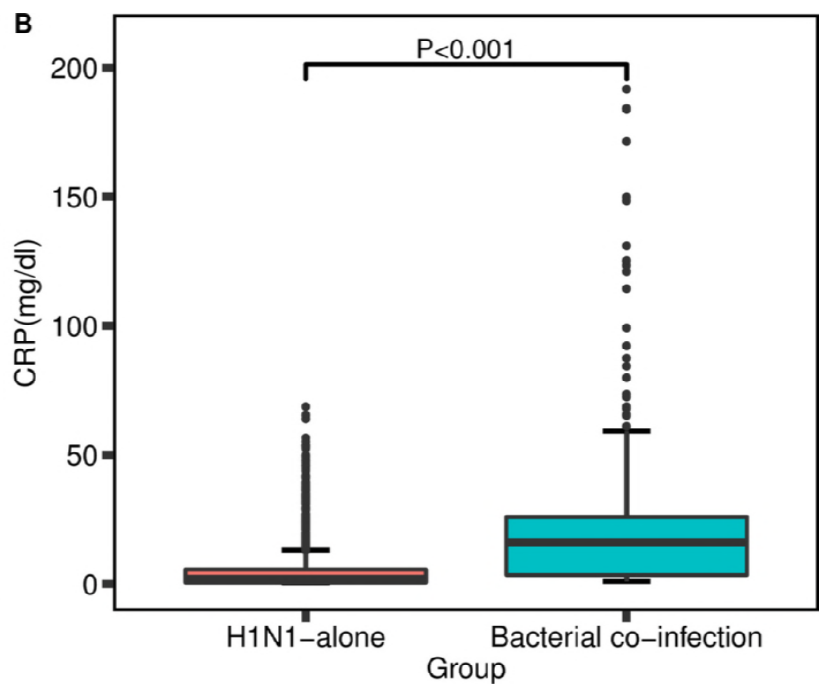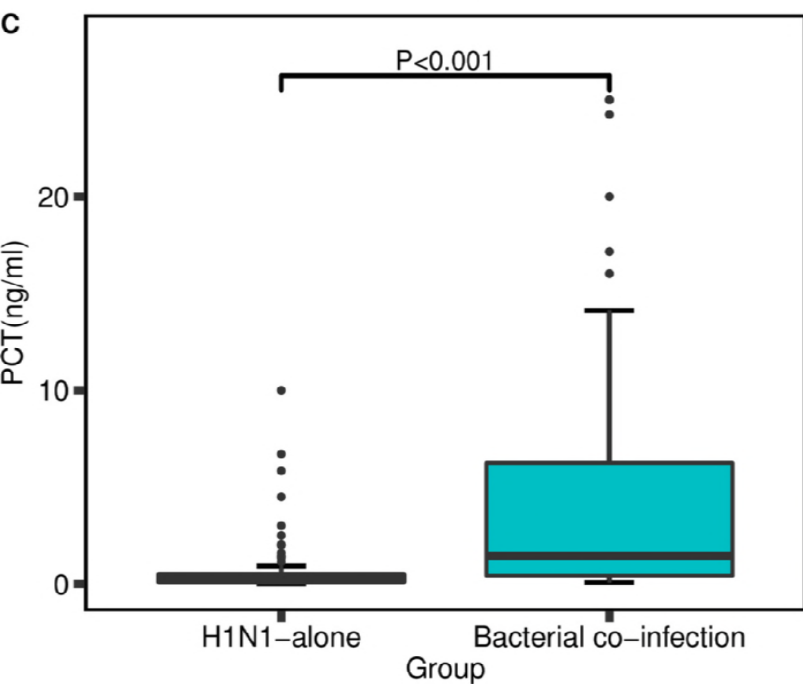

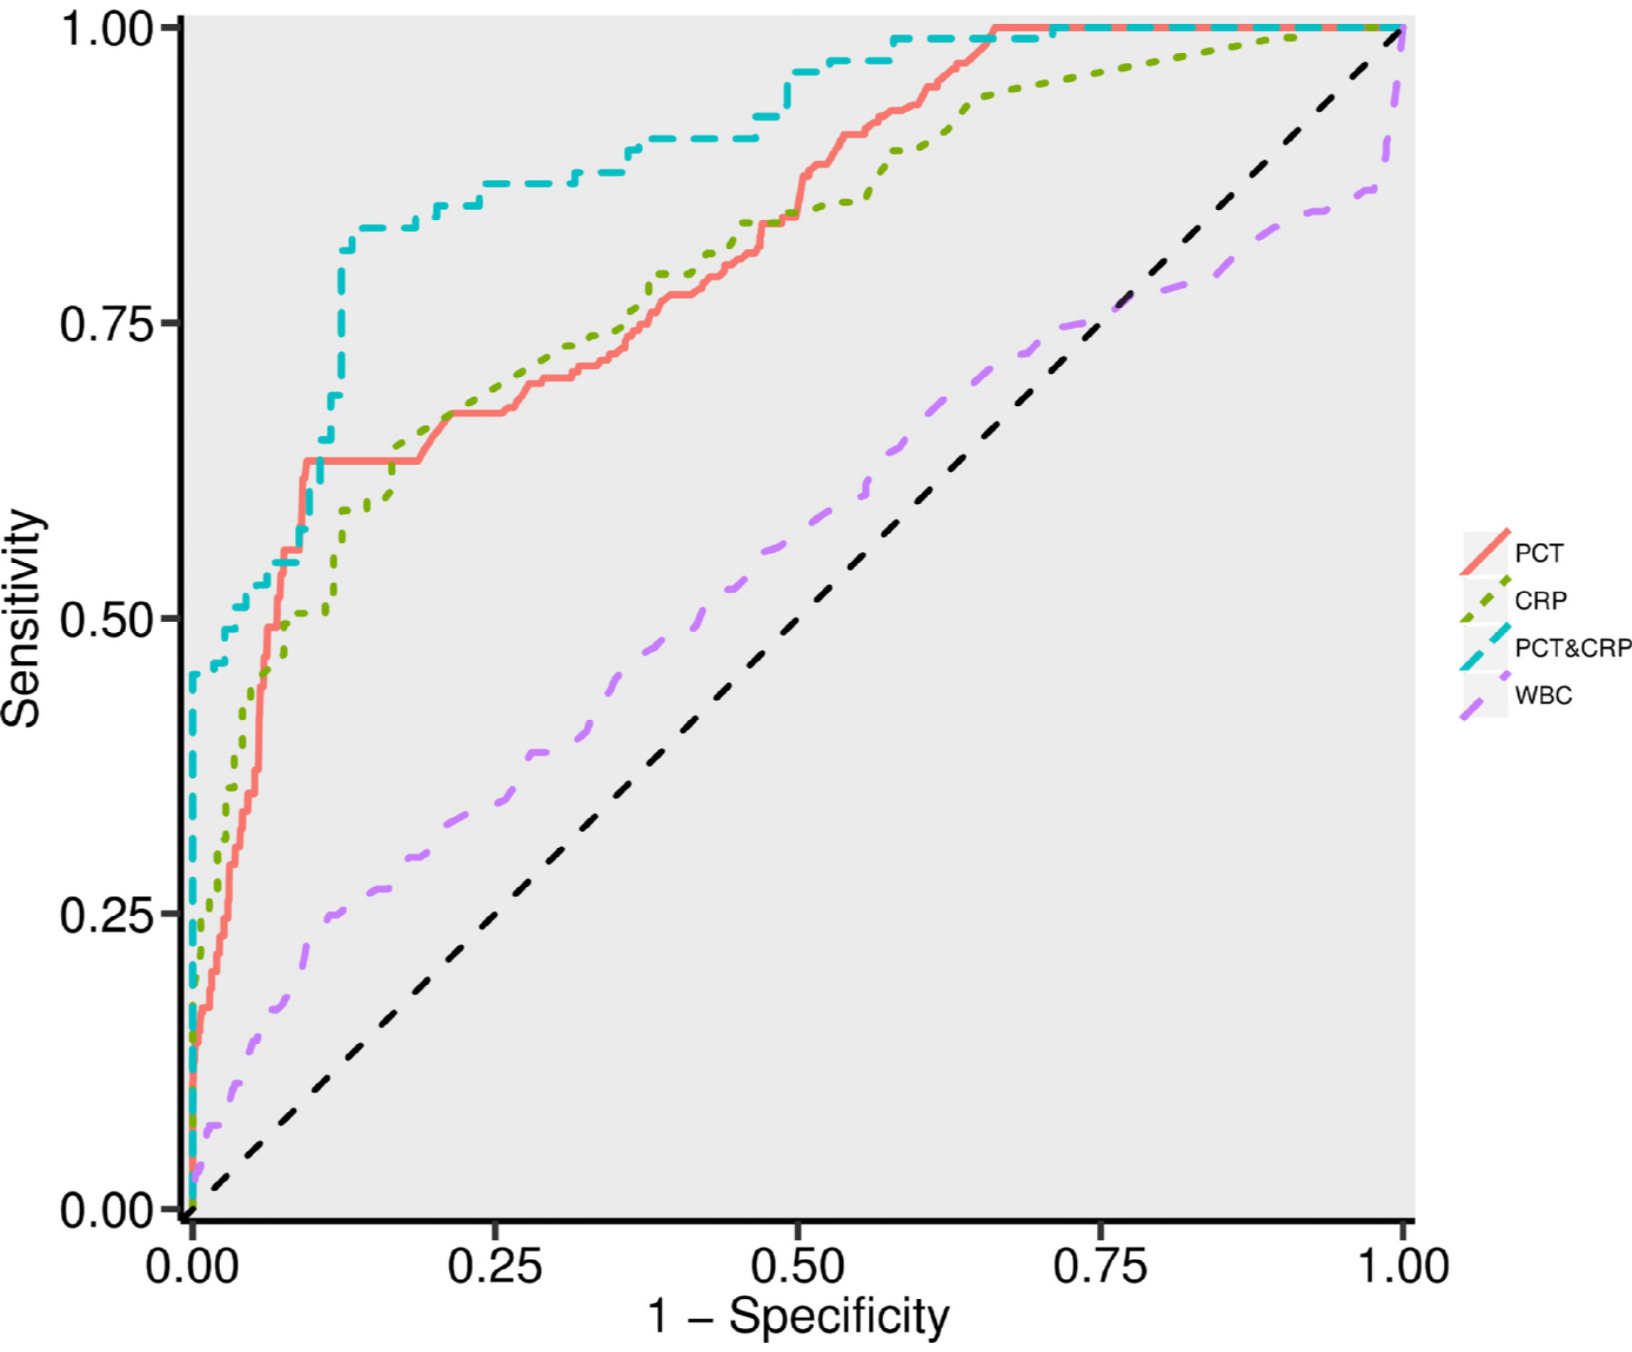

**Table 1** Demographic and clinical characteristics of patients with H1N1 influenza who presented with and without bacterial co-infections.

| Characteristic                                      | H1N1 alone<br>( <i>n</i> = 2954) | Bacterial co-infection<br>( <i>n</i> = 226) | <i>p</i> * |
|-----------------------------------------------------|----------------------------------|---------------------------------------------|------------|
| Age (years), median (IQR)                           | 2.5 (1.2, 4.0)                   | 2.4 (1.0, 4.1)                              | 0.197      |
| Male, <i>n</i> (%)                                  | 1794 (49.5)                      | 105 (47.6)                                  | 0.240      |
| Weight (kg), median (IQR)                           | 9.4 (5.2, 20.8)                  | 9.6 (4.8, 21.5)                             | 0.368      |
| Patients, <i>n</i> (%)                              |                                  |                                             | <0.001     |
| Inpatient                                           | 432 (14.3)                       | 114 (50.4)                                  |            |
| Outpatient                                          | 2522 (85.4)                      | 112 (49.6)                                  |            |
| Total length of hospital stays (days), median (IQR) | 5.0 (2.0, 9.0)                   | 10.00 (6.0, 18.3)                           | <0.001     |
| ICU admission, <i>n</i> (%)                         | 77 (2.6)                         | 82 (36.3)                                   | <0.001     |
| Total length of ICU stays (days), median (IQR)      | 6.0 (3.8, 10.0)                  | 11.0 (6.3, 19.8)                            | <0.001     |
| Total cost (RMB), median (IQR)                      | 1213.2 (205.5, 3041.7)           | 3467.3 (1302.3, 41321.6)                    | <0.001     |
| In-hospital mortality, <i>n</i> (%)                 | 3 (0.1)                          | 11 (4.8)                                    | <0.001     |

Abbreviations: IQR: interquartile range; ICU: intensive care unit; \* The differences between the H1N1-alone group and bacterial co-infection group were examined using the Wilcoxon rank sum test or Chi-square tests.

**Table 2** Univariate and multivariate logistic regression analyses of biomarkers for of bacterial co-infection in H1N1 patients infected with H1N1.

| Variable | Univariate |      |           |          | Multivariate |      |           |          |
|----------|------------|------|-----------|----------|--------------|------|-----------|----------|
|          | $\beta$    | OR   | 95% CI    | <i>p</i> | $\beta$      | OR   | 95% CI    | <i>p</i> |
| WBC      | 0.060      | 1.06 | 1.04-1.09 | <0.001   | -*           | -    | -         | -        |
| PCT      | 0.498      | 1.65 | 1.34-2.06 | <0.001   | 0.546        | 1.73 | 1.34-2.42 | <0.001   |
| CRP      | 0.073      | 1.08 | 1.06-1.09 | <0.001   | 0.087        | 1.09 | 1.06-1.13 | <0.001   |

Abbreviations:  $\beta$ : regression coefficient; OR: odds ratio; CI: confidence interval; \* In the multivariate logistic regression analysis, WBC counts ( $p>0.05$ ) were excluded from the final model based on the results of the forward stepwise analysis.

**Table 3** Discriminatory performance of WBC, CRP, PCT and the constructed model for detecting patients with H1N1 influenza and a bacterial co-infection.

| Variables | AUC (95% CI)        | cutoff level | Sensitivity | Specificity | PPV   | NPV   |
|-----------|---------------------|--------------|-------------|-------------|-------|-------|
| WBC       | 0.551 (0.502-0.592) | 11.56        | 0.267       | 0.887       | 0.144 | 0.910 |
| CRP       | 0.762 (0.722-0.803) | 13.55        | 0.633       | 0.856       | 0.330 | 0.971 |
| PCT       | 0.801 (0.772-0.855) | 0.52         | 0.643       | 0.886       | 0.773 | 0.852 |
| PCT&CRP * | 0.893 (0.852-0.934) | -            | 0.830       | 0.868       | 0.854 | 0.846 |

Abbreviations: AUC: area under the receiver-operating-characteristic curve; CI: confidence interval; PPV: positive predictive value; NPV: negative predictive value; PCT&CRP:  $\text{Logit}(P) = -1.912 + 0.546 \text{ PCT} + 0.087 \text{ CRP}$ .
